# Supplementary material for: Detection of medically relevant volatile organic compounds with graphene field-effect transistors and separated by low-frequency spectral and time signatures
Source: Royal Society of Chemistry journal article supplement (doi:10.1039/d3nr04961b), 2023-12-12
Supplement: d3nr04961b1.pdf [file d3nr04961b1.pdf]

## *Supporting Information*

### **Detection of medically relevant volatile organic compounds by graphene field-effect transistors and separated by low-frequency spectral and time signatures.**

Bruno Gil\*, Dominic Wales, Haijie Tan and Eric Yeatman

---

*Department of Electrical and Electronic Engineering, Imperial College London, South Kensington Campus, London SW7 2AZ, UK.*

\* Correspondence email: [b.gil-rosa@imperial.ac.uk](mailto:b.gil-rosa@imperial.ac.uk)

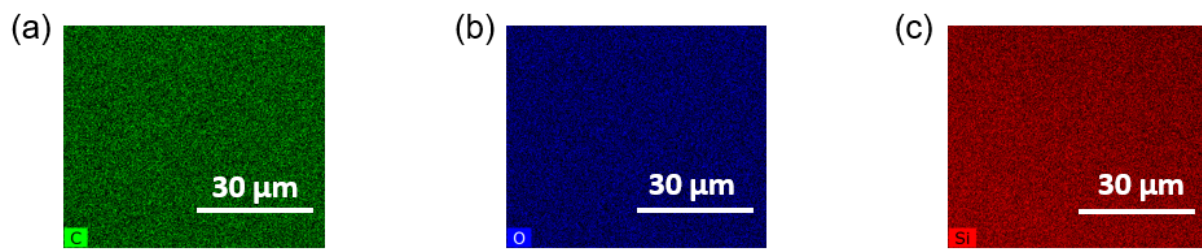

**Figure S1** – EDX mapping of the elements composing the graphene channel. **(a)** Carbon (C). **(b)** Oxygen (O). **(c)** Silicon (Si).

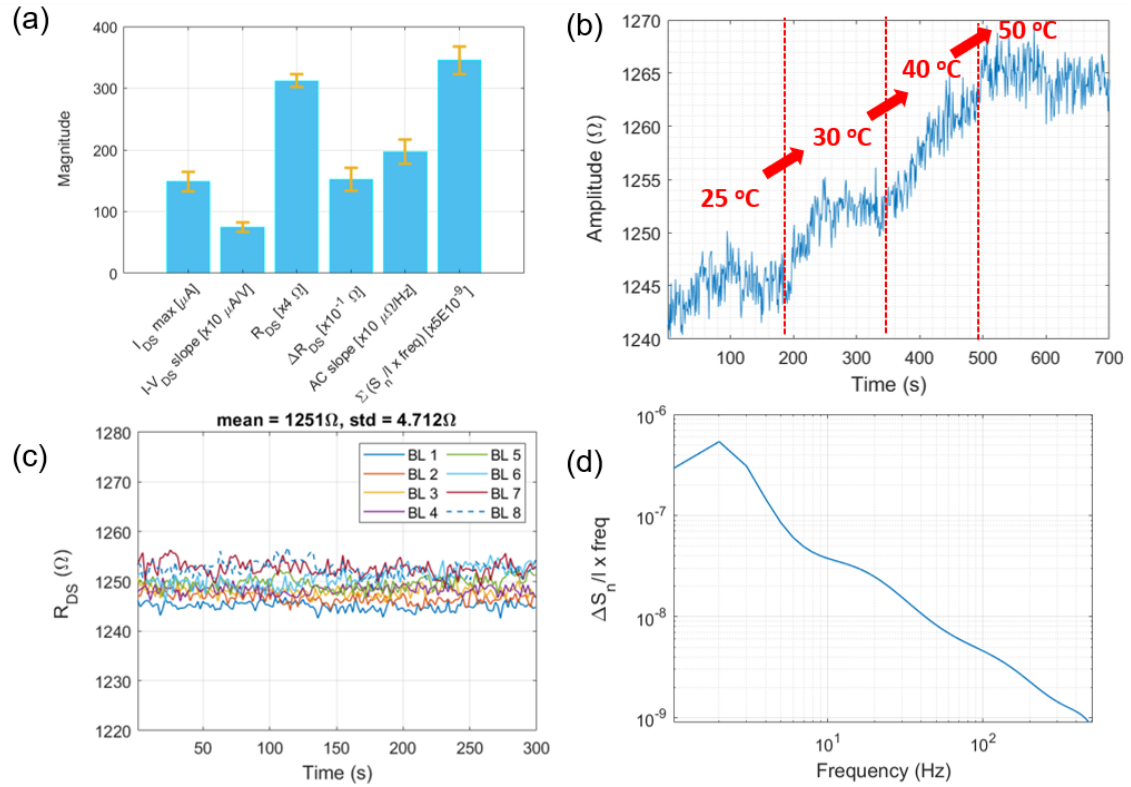

**Figure S2** – (a) Statistical metrics – average and standard deviation – calculated amongst the 12 graphene channels available on the system, with different electrical signal modalities measured: maximum current amplitude ( $I_{DS\ max}$ ) and linear slope ( $I_{DS} - V_{DS}$  slope) for the DC measurements, resistance value ( $R_{DS}$ ), resistance variation ( $\Delta R_{DS}$ ) and slope for the AC measurements, and statistical power ( $\Sigma S_n/l \times freq$ ) for the band-limited spectral noise measurements. (b) Variation of the graphene resistance ( $R_{DS}$ ) due to increasing chamber temperature (hotplate) and without flow of gas passing through the GFET chip array. (c) Exemplary baseline curves (BL1 to BL8) recorded for pure nitrogen flow during the cyclic time measurements of  $R_{DS}$  and associated statistical metrics (average and standard deviation). (d) Baseline spectral noise measured for nitrogen and used as a template for signal subtraction from the noise curves obtained for the individual VOCs.
